# Supplementary material
Source: Research Square preprint supplement (doi:10.21203/rs.3.rs-9180568/v1)
Supplement: Supplementary file 1 [file bf0c705cdb26511251160518.docx]

Supplementary table. Embryo mortality following bacterial inoculation in pilot test and three experimental trials

| Experiment | Embryonic day on inoculation | Treatment Group | No. of Embryos | Mortality at 24 hpi | Mortality at 48 hpi | Mortality at 72 hpi | Mortality at 5 dpi |
| --- | --- | --- | --- | --- | --- | --- | --- |
| Pilot test | 7 | Inoculated | 10 | 0/10 (0%) | 1/9* (11.1%) | 8/9 (88.9%) | 0/1 (0%) |
| Pilot test | 7 | Negative Control | 10 | 0/10 (0%) | 0/10 (0%) | 0/10 (0%) | - |
| First trial | 7 | Inoculated | 20 | 1/20 (5%) | 9/19* (47.3%) | - | - |
| First trial | 7 | Negative Control | 10 | 0/10 (0%) | 0/10 (0%) | - | - |
| Second trial | 9.5 | Inoculated | 15 | 0/15 (0%) | 8/15 (53.3%) | - | - |
| Second trial | 9.5 | Negative Control | 10 | 0/10 (0%) | 0/10 (0%) | - | - |
| First trial Citometry | 9.5 | Inoculated | 20 | 0/20 (0%) | 8/20 (40%) | - | - |
| First trial Citometry | 9.5 | Negative Control | 12 | 0/12 (0%) | 0/12 (0%) | - | - |
| Second trial Citometry | 9.5 | Inoculated | 30 | 0/30 (0%) | 12/30 (40%) | 10/18 (61.1%) | 1/8 (12.5%) |
| Second trial Citometry | 9.5 | Negative Control | 12 | 0/12 (0%) | 0/12 (0%) | 0/12 (0%) | 0/12 (0%) |
| Pharmacological  assay | 9.5 | Positive control | 24 | 0/24 (0%) | 8/12** (66.7%) | - | - |
| Pharmacological  assay | 9.5 | Negative Control | 16 | 0/16 (0%) | 0/8** (0%) | - | - |
| Pharmacological  assay | 9.5 | Norfloxacin | 18 | 0/18 (0%) | 1/9** (11.1%) | - | - |
| Pharmacological  assay | 9.5 | Indomethacin | 22 | 0/22 (0%) | 6/11** (54.5%) | - | - |

*One of the embryos were euthanized with 24 hours; ** Half of the embryos were euthanized with 24 hours hpi: hours post-inoculation; dpi: days post-inoculation. Chi-square; *p* < 0.05.
